# Supplementary material
Source: PubMed Central journal article supplement (PMC5522621)
Supplement: NIHMS864238-supplement.pdf [file NIHMS864238-supplement.pdf]

**Appendix**  
**Smoking-Cessation Assistance: Before and After Stage 1 Meaningful Use Implementation**  
**Bailey et al.**

**Appendix Table 1.** Unadjusted ORs of Smoking Assessment and Cessation Assistance Among Non-pregnant Patients by Study Year

| <b>Outcome</b>                                        | <b>2010<br/>N (%)</b> | <b>2012<br/>N (%)</b> | <b>2012 vs<br/>2010 (ref)<br/>OR<br/>(95% CI)</b> | <b>2014<br/>N (%)</b> | <b>2014 vs<br/>2010 (ref)<br/>OR<br/>(95% CI)</b> | <b>2014 vs<br/>2012 (ref)<br/>OR<br/>(95% CI)</b> |
|-------------------------------------------------------|-----------------------|-----------------------|---------------------------------------------------|-----------------------|---------------------------------------------------|---------------------------------------------------|
| All non-pregnant patients                             | 55,398                | 60,610                |                                                   | 66,712                |                                                   |                                                   |
| Smoking status assessed                               | 52,019 (93.90%)       | 58,282 (96.16%)       | <b>1.63</b><br><b>(1.54, 1.72)**</b>              | 64,981 (97.41%)       | <b>2.44</b><br><b>(2.30, 2.59)**</b>              | <b>1.50</b><br><b>(1.41, 1.60)**</b>              |
| Current smoker                                        | 16,802 (30.33%)       | 17,631 (29.09%)       | <b>0.94</b><br><b>(0.92, 0.97)**</b>              | 18,111 (27.15%)       | <b>0.86</b><br><b>(0.84, 0.88)**</b>              | <b>0.91</b><br><b>(0.89, 0.93)**</b>              |
| Among non-pregnant smokers                            | 16,802                | 17,631                |                                                   | 18,110                |                                                   |                                                   |
| Counseling given                                      | 4,998 (29.75%)        | 9,500 (53.88%)        | <b>3.55</b><br><b>(3.38, 3.72)**</b>              | 12,585 (69.49%)       | <b>7.64</b><br><b>(7.27, 8.02)**</b>              | <b>2.15</b><br><b>(2.06, 2.25)**</b>              |
| Smoking cessation medication ordered                  | 2,032 (12.09%)        | 2,338 (13.26%)        | <b>1.11</b><br><b>(1.04, 1.18)*</b>               | 2,839 (15.68%)        | <b>1.35</b><br><b>(1.27, 1.44)**</b>              | <b>1.22</b><br><b>(1.15, 1.29)**</b>              |
| Smoking cessation medication ordered and/or discussed | 4,638 (27.60%)        | 6,987 (39.63%)        | <b>1.72</b><br><b>(1.65, 1.80)**</b>              | 8,747 (48.30%)        | <b>2.45</b><br><b>(2.34, 2.56)**</b>              | <b>1.42</b><br><b>(1.36, 1.48)**</b>              |

*Note:* All outcomes used discrete fields and natural language processing from the electronic health record except for Current smoker and Smoking cessation medication ordered (only discrete fields in the electronic health record). Boldface indicates statistical significance (\* $p < 0.01$ ; \*\* $p < 0.0001$ ).

**Appendix**  
**Smoking-Cessation Assistance: Before and After Stage 1 Meaningful Use Implementation**  
**Bailey et al.**

**Appendix Table 2.** Unadjusted ORs of Smoking Assessment and Cessation Assistance Among Pregnant Patients by Year

| <b>Outcome</b>                                        | <b>2010<br/>N (%)</b> | <b>2012<br/>N (%)</b> | <b>2012 vs<br/>2010 (ref)<br/>OR<br/>(95% CI)</b> | <b>2014<br/>N (%)</b> | <b>2014 vs<br/>2010 (ref)<br/>OR<br/>(95% CI)</b> | <b>2014 vs<br/>2012 (ref)<br/>OR<br/>(95% CI)</b> |
|-------------------------------------------------------|-----------------------|-----------------------|---------------------------------------------------|-----------------------|---------------------------------------------------|---------------------------------------------------|
| All pregnant patients                                 | 2,713                 | 2,698                 |                                                   | 2,561                 |                                                   |                                                   |
| Smoking status assessed                               | 2,553 (94.10%)        | 2,613 (96.85%)        | <b>1.90</b><br><b>(1.45, 2.49)**</b>              | 2,520 (98.40%)        | <b>4.01</b><br><b>(2.82, 5.69)**</b>              | <b>2.18</b><br><b>(1.49, 3.19)**</b>              |
| Current smoker                                        | 305 (11.24%)          | 292 (10.82%)          | 0.94<br>(0.79, 1.11)                              | 314 (12.26%)          | 1.06<br>(0.89, 1.26)                              | 1.14<br>(0.95, 1.35)                              |
| Among pregnant smokers                                | 305                   | 292                   |                                                   | 314                   |                                                   |                                                   |
| Counseling given                                      | 49 (16.07%)           | 124 (42.47%)          | <b>5.15</b><br><b>(3.27, 8.09)**</b>              | 174 (55.41%)          | <b>10.36</b><br><b>(6.63, 16.21)**</b>            | <b>2.15</b><br><b>(1.52, 3.04)**</b>              |
| Smoking cessation medication ordered                  | 28 (9.18%)            | 25 (8.56%)            | 0.94<br>(0.53, 1.67)                              | 30 (9.55%)            | 0.95<br>(0.55, 1.65)                              | 1.02<br>(0.58, 1.80)                              |
| Smoking cessation medication ordered and/or discussed | 53 (17.38%)           | 82 (28.08%)           | <b>1.92</b><br><b>(1.28, 2.87)*</b>               | 90 (28.66%)           | <b>1.94</b><br><b>(1.3, 2.90)*</b>                | 1.03<br>(0.7, 1.50)                               |

*Note:* All outcomes used discrete fields and natural language processing from the electronic health record except for Current smoker and Smoking cessation medication ordered (only discrete fields from the electronic health record). Boldface indicates statistical significance (\* $p < 0.01$ ; \*\* $p < 0.0001$ ).
